# Supplementary material
Source: Elsevier journal article supplement (https://www.sciencedirect.com/science/article/pii/S1646289015000655)
Supplement: mmc1 [file S1646289015000655:mmc1.pdf]

## **Anexo 1**

Nombre: \_\_\_\_\_

### ENCUESTA (Marque con una x)

1. Edad:

\_\_\_\_\_ 19-34

\_\_\_\_\_ 41- 60

\_\_\_\_\_  $\geq$  60

2. Sexo:

\_\_\_\_\_ Femenino

\_\_\_\_\_ Masculino

3. Alteraciones gastrointestinales (tienes mala digestión a repetición o padeces de gastritis, presentas antecedentes de giardiásis).

a. Sí \_\_\_\_\_

b. No \_\_\_\_\_

4. ¿Eres alérgico?

a. Sí \_\_\_\_\_

b. No \_\_\_\_\_

En caso afirmativo especificar tipo de alergia \_\_\_\_\_

5. ¿Eres diabético?

a. Sí \_\_\_\_\_

b. No \_\_\_\_\_

6. ¿Presentas carencia o déficit de vitaminas?

a. Sí \_\_\_\_\_

b. No \_\_\_\_\_

c. No sé \_\_\_\_\_

7. Localización de las aftas.

a) Labio \_\_\_\_\_

b) Carrillo \_\_\_\_\_

c) Encía \_\_\_\_\_

d) Paladar \_\_\_\_\_

e) Lengua \_\_\_\_\_

f) Suelo de boca \_\_\_\_\_

8. Tiempo de evolución de las aftas.

a. 7-10 días \_\_\_\_\_

b. 14 días \_\_\_\_\_

c. 6 semanas o más \_\_\_\_\_

## INVENTARIO DE SÍNTOMAS DE ESTRÉS (versión INOR-2,1998)

Edad\_\_\_\_\_ Sexo\_\_\_\_\_ Estado Civil\_\_\_\_\_

Institución\_\_\_\_\_Tiempo en ella\_\_\_\_\_Fecha\_\_\_\_\_

INSTRUCCIONES: Marque con una X los signos de malestar que ha padecido en los últimos 12 meses y la frecuencia con que los ha presentado.

| Malestares                                     | Nunca | Rara vez | En Ocasiones | Frecuentemente | Muy frecuente | Siempre |
|------------------------------------------------|-------|----------|--------------|----------------|---------------|---------|
| 1.Depresión                                    |       |          |              |                |               |         |
| 2. Fuertes latidos del corazón.                |       |          |              |                |               |         |
| 3. Resequedad en la boca.                      |       |          |              |                |               |         |
| 4. Explosiones de ira.                         |       |          |              |                |               |         |
| 5. Imperiosa necesidad de esconderse.          |       |          |              |                |               |         |
| 6. Muchas ganas de llorar.                     |       |          |              |                |               |         |
| 7. Imposibilidad de concentrarse.              |       |          |              |                |               |         |
| 8. Debilidad, mareos.                          |       |          |              |                |               |         |
| 9. Fatiga.                                     |       |          |              |                |               |         |
| 10. Sentirse atado.                            |       |          |              |                |               |         |
| 11.Tics nervioso.                              |       |          |              |                |               |         |
| 12. Asustarse con pequeños ruidos.             |       |          |              |                |               |         |
| 13. Risa nerviosa.                             |       |          |              |                |               |         |
| 14.Tartamudeo                                  |       |          |              |                |               |         |
| 15. Rechinar los dientes.                      |       |          |              |                |               |         |
| 16. Mandíbulas apretadas.                      |       |          |              |                |               |         |
| 17.Insomnia                                    |       |          |              |                |               |         |
| 18. Dolores de cabeza por tensión.             |       |          |              |                |               |         |
| 19. Migraña.                                   |       |          |              |                |               |         |
| 20. Sudación excesiva.                         |       |          |              |                |               |         |
| 21. Necesidad frecuente de orinar.             |       |          |              |                |               |         |
| 22. Indigestión.                               |       |          |              |                |               |         |
| 23. Tensión premenstrual. O irregularidades.   |       |          |              |                |               |         |
| 24. Dolor de cuello o espalda.                 |       |          |              |                |               |         |
| 25. Pérdida de apetito.                        |       |          |              |                |               |         |
| 26. Ganas de comer a todas horas.              |       |          |              |                |               |         |
| 27. Aumento en cantidad diaria de cigarrillos. |       |          |              |                |               |         |
| 28. Aumento en dosis de tranquilizantes.       |       |          |              |                |               |         |

|                                                     |  |  |  |  |  |  |
|-----------------------------------------------------|--|--|--|--|--|--|
| <b>29. Aumento en la ingestión de alcohol.</b>      |  |  |  |  |  |  |
| <b>30. Pesadillas.</b>                              |  |  |  |  |  |  |
| <b>31. Ansiedad.</b>                                |  |  |  |  |  |  |
| <b>32. Propensión a accidentes.</b>                 |  |  |  |  |  |  |
| <b>33. Imperiosa necesidad de estarse moviendo.</b> |  |  |  |  |  |  |
| <b>34. Estreñimiento</b>                            |  |  |  |  |  |  |
| <b>35. Gripe frecuentes.</b>                        |  |  |  |  |  |  |
| <b>36. Manos y pies fríos.</b>                      |  |  |  |  |  |  |
| <b>37. Alergias.</b>                                |  |  |  |  |  |  |
| <b>38. Gastritis.</b>                               |  |  |  |  |  |  |
| <b>39. Colitis.</b>                                 |  |  |  |  |  |  |
| <b>40. Úlcera.</b>                                  |  |  |  |  |  |  |
| <b>41. Hipertensión.</b>                            |  |  |  |  |  |  |
| <b>42. Temblores.</b>                               |  |  |  |  |  |  |
